# Supplementary material
Source: PubMed Central journal article supplement (PMC4621795)
Supplement: peds_2015-0807supplementarydata.pdf [file peds_2015-0807supplementarydata.pdf]

# Supplemental Information

## SUPPLEMENT 1 ICD-9 CODES PER PSYCHIATRIC DIAGNOSIS

### ADHD

|       |       |       |       |       |       |       |       |       |       |
|-------|-------|-------|-------|-------|-------|-------|-------|-------|-------|
| 31200 | 31201 | 31202 | 31203 | 31210 | 31211 | 31212 | 31213 | 31220 | 31221 |
| 31222 | 31223 | 3124  | 3128  | 31281 | 31282 | 31289 | 3129  | 31381 | 31400 |
| 31401 | 3141  | 3142  | 3148  | 3149  |       |       |       |       |       |

### Anxiety

|       |       |       |       |       |       |       |       |       |       |
|-------|-------|-------|-------|-------|-------|-------|-------|-------|-------|
| 29384 | 30000 | 30001 | 30009 | 30010 | 30020 | 30021 | 30023 | 30029 | 3003  |
| 3005  | 30089 | 3009  | 3080  | 3081  | 3082  | 3083  | 3084  | 3089  | 30981 |
| 3130  | 3131  | 31321 | 3133  | 31382 | 31383 |       |       |       |       |

### Mood Disorders

|       |       |       |       |       |       |       |       |       |       |
|-------|-------|-------|-------|-------|-------|-------|-------|-------|-------|
| 29600 | 29601 | 29602 | 29603 | 29604 | 29605 | 29606 | 29610 | 29611 | 29612 |
| 29613 | 29614 | 29615 | 29616 | 29640 | 29641 | 29642 | 29643 | 29644 | 29645 |
| 29646 | 29650 | 29651 | 29652 | 29653 | 29654 | 29655 | 29656 | 29660 | 29661 |
| 29662 | 29663 | 29664 | 29665 | 29666 | 2967  | 29680 | 29681 | 29682 | 29689 |
| 29690 | 29699 | 29383 | 29620 | 29621 | 29622 | 29623 | 29624 | 29625 | 29626 |
| 29630 | 29631 | 29632 | 29633 | 29634 | 29635 | 29636 | 3004  | 311   |       |

### Pervasive Developmental Disorders

|       |       |       |       |       |       |       |       |  |  |
|-------|-------|-------|-------|-------|-------|-------|-------|--|--|
| 29900 | 29901 | 29910 | 29911 | 29980 | 29981 | 29990 | 29991 |  |  |
|-------|-------|-------|-------|-------|-------|-------|-------|--|--|

### Psychoses

|       |       |       |       |       |       |       |       |       |       |
|-------|-------|-------|-------|-------|-------|-------|-------|-------|-------|
| 29381 | 29382 | 29500 | 29501 | 29502 | 29503 | 29504 | 29505 | 29510 | 29511 |
| 29512 | 29513 | 29514 | 29515 | 29520 | 29521 | 29522 | 29523 | 29524 | 29525 |
| 29530 | 29531 | 29532 | 29533 | 29534 | 29535 | 29540 | 29541 | 29542 | 29543 |
| 29544 | 29545 | 29550 | 29551 | 29552 | 29553 | 29554 | 29555 | 29560 | 29561 |
| 29562 | 29563 | 29564 | 29565 | 29570 | 29571 | 29572 | 29573 | 29574 | 29575 |
| 29580 | 29581 | 29582 | 29583 | 29584 | 29585 | 29590 | 29591 | 29592 | 29593 |
| 29594 | 29595 | 2970  | 2971  | 2972  | 2973  | 2978  | 2979  | 2980  | 2981  |
| 2982  | 2983  | 2984  | 2988  | 2989  |       |       |       |       |       |

Alcohol and Substance Disorders

|       |       |       |       |       |       |       |       |       |       |
|-------|-------|-------|-------|-------|-------|-------|-------|-------|-------|
| 2910  | 2911  | 2912  | 2913  | 2914  | 2915  | 2918  | 29181 | 29182 | 29189 |
| 2919  | 30300 | 30301 | 30302 | 30303 | 30390 | 30391 | 30392 | 30393 | 30500 |
| 30501 | 30502 | 30503 | 76071 | 9800  | 2920  | 29211 | 29212 | 29281 | 29282 |
| 29283 | 29284 | 29285 | 29289 | 2929  | 30400 | 30401 | 30402 | 30403 | 30410 |
| 30411 | 30412 | 30413 | 30420 | 30421 | 30422 | 30423 | 30430 | 30431 | 30432 |
| 30433 | 30440 | 30441 | 30442 | 30443 | 30450 | 30451 | 30452 | 30453 | 30460 |
| 30461 | 30462 | 30463 | 30470 | 30471 | 30472 | 30473 | 30480 | 30481 | 30482 |
| 30483 | 30490 | 30491 | 30492 | 30493 | 30520 | 30521 | 30522 | 30523 | 30530 |
| 30531 | 30532 | 30533 | 30540 | 30541 | 30542 | 30543 | 30550 | 30551 | 30552 |
| 30553 | 30560 | 30561 | 30562 | 30563 | 30570 | 30571 | 30572 | 30573 | 30580 |
| 30581 | 30582 | 30583 | 30590 | 30591 | 30592 | 30593 | 64830 | 64831 | 64832 |
| 64833 | 64834 | 65550 | 65551 | 65553 | 76072 | 76073 | 76075 | 7795  | 96500 |
| 96501 | 96502 | 96509 | V6542 |       |       |       |       |       |       |

Other Mental Health Conditions

|       |       |       |       |       |       |       |       |       |       |
|-------|-------|-------|-------|-------|-------|-------|-------|-------|-------|
| 3090  | 3091  | 30922 | 30923 | 30924 | 30928 | 30929 | 3093  | 3094  | 30983 |
| 30989 | 3099  | 3010  | 30111 | 30112 | 30113 | 30120 | 30121 | 30122 | 3013  |
| 3014  | 30150 | 30151 | 30159 | 3016  | 3017  | 30182 | 30183 | 30184 | 30189 |
| 3019  | V6284 | E9500 | E9501 | E9502 | E9503 | E9504 | E9505 | E9506 | E9507 |
| E9508 | E9509 | E9510 | E9511 | E9518 | E9520 | E9521 | E9528 | E9529 | E9530 |
| E9531 | E9538 | E9539 | E954  | E9550 | E9551 | E9552 | E9553 | E9554 | E9555 |
| E9556 | E9557 | E9559 | E956  | E9570 | E9571 | E9572 | E9579 | E9580 | E9581 |
| E9582 | E9583 | E9584 | E9585 | E9586 | E9587 | E9588 | E9589 | E959  | 33392 |
| V110  | V111  | V112  | V114  | V118  | V119  | V154  | V1541 | V1542 | V1549 |
| V1582 | V6285 | V663  | V701  | V702  | V7101 | V7102 | V7109 | V790  | V792  |
| V793  | V798  | V799  | 3051  | 30510 | 30512 | 30513 | 3575  | 4255  | 5353  |
| 53530 | 53531 | 5710  | 5711  | 5712  | 5713  | 7903  | V113  | V791  | 30012 |
| 30013 | 30014 | 30015 | 3006  | 30016 | 30019 | 29389 | 2939  | 3101  | 316   |
| 64840 | 64841 | 64842 | 64843 | 64844 | V402  | V403  | V4031 | V4039 | V409  |
| V673  | 3060  | 3061  | 3062  | 3063  | 3064  | 30650 | 30652 | 30653 | 30659 |
| 3066  | 3067  | 3068  | 3069  | 3021  | 3022  | 3023  | 3024  | 30250 | 30251 |
| 30252 | 30253 | 3026  | 30270 | 30271 | 30272 | 30273 | 30274 | 30275 | 30276 |
| 30279 | 30281 | 30282 | 30283 | 30284 | 30285 | 30289 | 3029  | 30651 | 30740 |
| 30741 | 30742 | 30743 | 30744 | 30745 | 30746 | 30747 | 30748 | 30749 | 30011 |
| 3007  | 30081 | 30082 | 30780 | 30781 | 30789 | 3076  | 3077  | 3073  | 30921 |
| 31323 | 31389 | 3139  | 30720 | 30721 | 30722 | 30723 | 31230 | 31231 | 31232 |
| 31233 | 31234 | 31235 | 31239 | 3071  | 30750 | 30751 | 30752 | 30753 | 30754 |
| 30759 |       |       |       |       |       |       |       |       |       |

## SUPPLEMENT 2 MEDICATIONS INCLUDED IN EACH DRUG CLASS PER MEPS

Please note: These are all of the medications included in the categories in MEPS, and some medications listed here may not have been prescribed to the children in the sample.

| Stimulants                     | SSRIs/Other Antidepressants                | Antipsychotics                         |
|--------------------------------|--------------------------------------------|----------------------------------------|
| Adderall                       | Amitriptyline                              | Abilify                                |
| Adipex-P                       | Amoxapine                                  | Amitriptyline-Chlordiazepoxide         |
| Amphetamine                    | Anafranil                                  | Amitriptyline-Perphenazine             |
| Amphetamine-Dextroamphetamine  | Aplenzin                                   | Aripiprazole                           |
| AppTrim                        | Budeprion                                  | Brompheniramine-<br>Pseudoephedrine TR |
| Atomoxetine (Strattera)        | Buproban                                   | Ceptaz                                 |
| Benzphetamine                  | Bupropion (Wellbutrin XL)                  | Chlorpromazine                         |
| Bontril PDM                    | Butalbital/ASA/Caffeine                    | Clozapine                              |
| Caffeine Citrate               | C-Lidocaine/DPH/Antacid                    | Compazine                              |
| Concerta                       | Celexa                                     | Compro                                 |
| Daytrana                       | Citalopram                                 | Fanapt                                 |
| Dexmethylphenidate             | Clomipramine                               | Fazaclo                                |
| Dextroamphetamine              | Cymbalta                                   | Fluphenazine                           |
| Diethylpropion Hydrochloride   | Desipramine                                | Geodon                                 |
| Fastin                         | Desyrel                                    | Haldol                                 |
| Focalin                        | Doxepin                                    | Haloperidol                            |
| Lisdexamfetamine, NF (Vyvanse) | Duloxetine                                 | Invega Sustenna                        |
| Metadate                       | Effexor                                    | Latuda                                 |
| Methylin                       | Elavil                                     | Lithium Carbonate                      |
| Methylphenidate (Concerta)     | Escitalopram, NF (Lexapro)                 | Lithobid                               |
| Nasal Decongestant 0.05% Spray | Fluoxetine (Prozac)                        | Loxapine                               |
| Nuvigil                        | Fluvoxamine                                | Moban                                  |
| Phendimetrazine                | Imipramine                                 | Navane                                 |
| Phentermine                    | Lexapro                                    | Olanzapine                             |
| ProCentra                      | Lidocaine/Hydroxyzine/Mylanta/<br>Donnatal | Orap                                   |
| Provigil                       | Luvox                                      | Perphenazine                           |
| Ritalin                        | Mirtazapine                                | Pimozide                               |
| Strattera                      | Nefazodone                                 | Prochlorperazine                       |
| Vyvanse                        | Nortriptyline                              | Quetiapine                             |
|                                | Pamelor                                    | Risperdal                              |
|                                | Paroxetine (Paxil)                         | Risperidone                            |
|                                | Pexeva                                     | Saphris                                |
|                                | Pristiq                                    | Seroquel                               |
|                                | Protriptyline Hydrochloride                | Symbyax                                |
|                                | Prozac                                     | Thioridazine                           |
|                                | Remeron                                    | Thiothixene                            |
|                                | Sarafem                                    | Thorazine                              |
|                                | Savella                                    | Transfer Factor LY                     |
|                                | Selegiline                                 | Transfer Factor $\mu$                  |
|                                | Selfemra                                   | Trifluoperazine Hydrochloride          |
|                                | Sertraline (Zoloft)                        | Ziprasidone Hydrochloride              |
|                                | Serzone                                    | Zyprexa                                |
|                                | Sinequan                                   |                                        |
|                                | Trazodone                                  |                                        |
|                                | Tussin-V                                   | $\alpha$ -Agonists                     |
|                                | Venlafaxine                                | Aldomet                                |
|                                | Vivactil                                   | Catapres                               |
|                                | Wellbutrin                                 | Clonidine                              |
|                                | Zoloft                                     | Guanfacine                             |
|                                | Zyban                                      | Intuniv                                |
|                                |                                            | Kapvay                                 |
|                                |                                            | Methylidopa                            |
|                                |                                            | Tenex                                  |

---

Anxiolytics/Sedatives

Aldex AN  
Allergy Relief  
Alprazolam  
Altaryl  
Ambien  
Atarax  
Ativan  
Banophen  
Benadryl  
Buspar  
Buspirone  
Child Allergy  
Chloral Hydrate  
Chlordiazepoxide  
Clonazepam  
Clorazepate Dipotassium  
Complete Allergy  
Compounded Rx  
Diastat AcuDial  
Diazepam  
Diphenhydramine (Benadryl)  
DiphenMax  
Doxepin Hydrochloride  
Equate Allergy  
Estazolam  
Flu Admin  
Flurazepam  
Furosemide  
Genahist  
Glyburide/Metformin  
Halcion  
Hydramine  
Hydrocodone/APAP  
Hydroxyz  
Hydroxyzine  
Klonopin  
Librium  
Lorazepam (Ativan)  
Lunesta  
Mebaral  
Melatonin  
Meprobamate  
Niravam  
Oxazepam  
Phenobarbital  
Q-Dryl  
Q-Dryl 12.5 mg/5 mL Elixir  
Restoril  
Rozerem  
Siladryl  
Siladryl Allergy  
Silphen Cough  
Simply Sleep  
Sinequan  
SM Allergy  
Sonata  
Store Allergy  
Temazepam  
Tranxene  
Triazolam

---

---

Continued

Valium  
Valu-Dryl  
Vistaril  
Vosol-HC Otic  
Xanax  
Zaleplon  
Zofran  
Zolpidem (Ambien)

---
